# Supplementary material for: Association of sedentary behavior, physical activity, and the "weekend warrior" pattern with muscle mass and strength in U.S. adults: cross-sectional NHANES study
Source: Research Square preprint supplement (doi:10.21203/rs.3.rs-6463560/v1), 2025-05-19
Supplement: Supplementary file 1 [file 43b4b6ba83705b80b0b1a153.docx]

**Association of sedentary behavior, physical activity, and the "weekend warrior" pattern with muscle mass and strength in U.S. adults**

**Supplementary Figure S1.** Flow chart of participants' inclusion

**Supplementary Table S1.** Baseline characteristics of participants according to physical activity pattern, NHANES 2011–2014

**Supplementary Table S2.** Association of PA with ASMI and GS stratified by sedentary time

**Supplementary Table S3.** Joint association of sedentary time and PA with ASMI and GS

**Supplementary Table S4.** Joint association of sedentary time and PA with ASMI and GS stratified by sex

**Supplementary Table S5.** Joint association of sedentary time and PA with ASMI and GS stratified by age

**Supplementary Table S6.** Association of PA pattern with ASMI and GS stratified by sex

**Supplementary Table S7.** Association of PA pattern with ASMI and GS stratified by age

**Supplementary Table S8.** Association of RA with ASMI and GS, with inactive as reference

**Supplementary Table S9.** Sensitivity analysis excluding participants with ≥600 min/week of PA: association of PA pattern with ASMI and GS

**Supplementary Table S10.** Sensitivity analysis excluding participants with ≥750 min/week of PA: association of PA pattern with ASMI and GS

**Supplementary Table S11.** Sensitivity analysis excluding participants extreme BMI: association of PA pattern with ASMI and GS


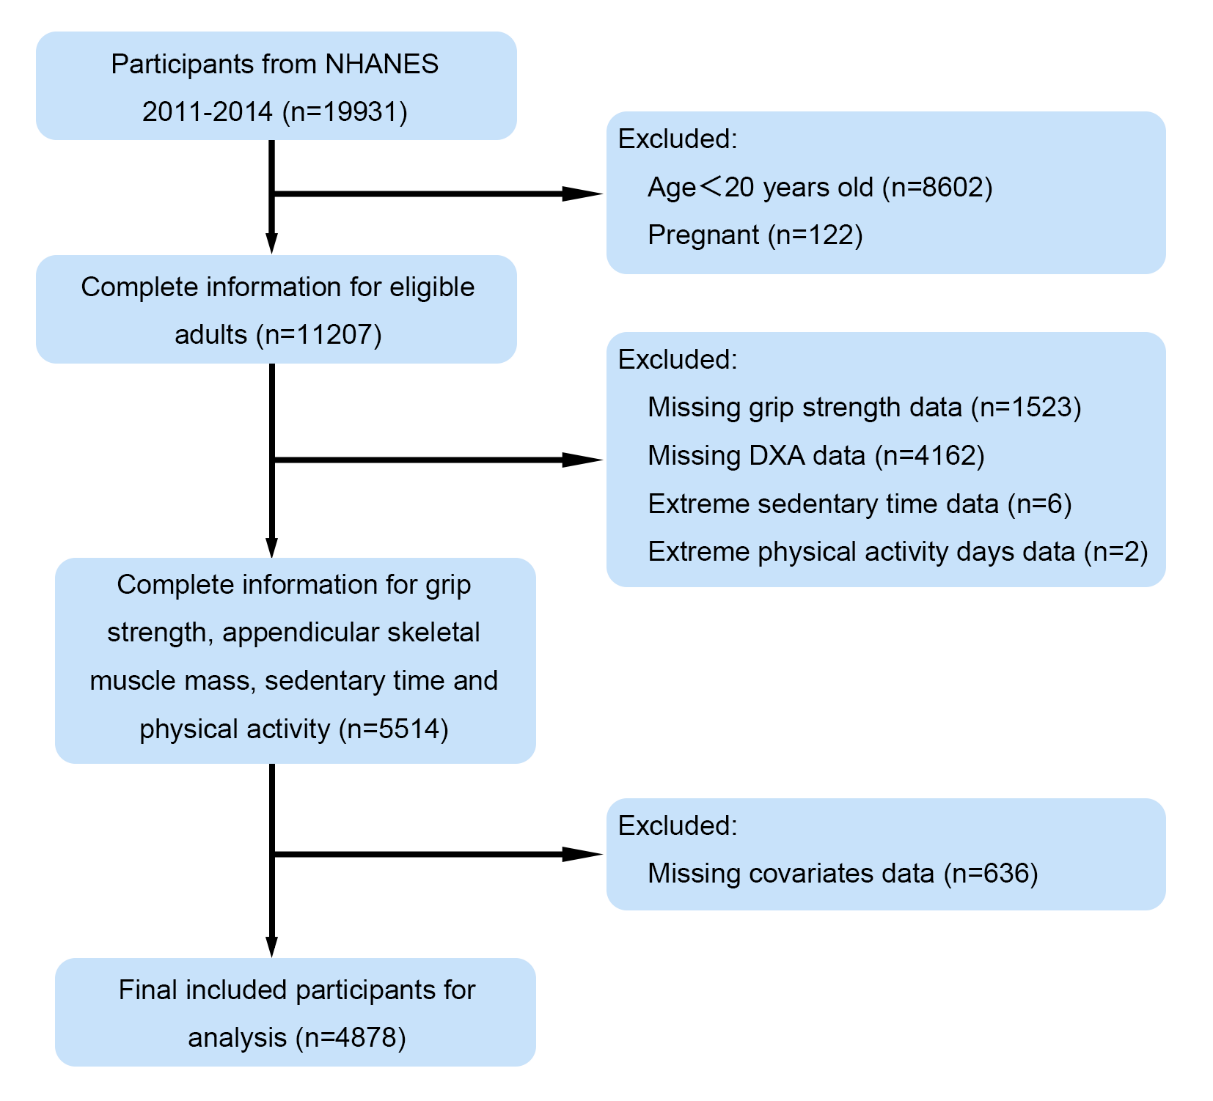


**Supplementary Figure S1. Flow chart of participants' inclusion.**

Abbreviations: NHANES, National Health and Nutrition Examination Survey; DXA, dual-energy X-ray absorptiometry.

| **Supplementary Table S1. Baseline characteristics of participants according to physical activity pattern, NHANES 2011–2014** | | | | | | |
| --- | --- | --- | --- | --- | --- | --- |
|  |  |  |  | Physically active | |  |
| Variablea | Total (n = 4878) | Inactive (n=2122) | Insufficiently active (n=1829) | Weekend warrior (n=377) | Regularly active (n=550) | *P* |
| Age, mean (SD), years | 39.26 (11.82) | 40.87 (11.69) | 39.67 (11.65) | 35.60 (10.82) | 34.95 (11.91) | <.001* |
| Age group, n (%) |  |  |  |  |  | <.001* |
| <45 | 3177 (62.07) | 1253 (56.59) | 1205 (61.23) | 294 (75.92) | 425 (74.17) |  |
| ≥45 | 1701 (37.93) | 869 (43.41) | 624 (38.77) | 83 (24.08) | 125 (25.83) |  |
| Sex, n (%) |  |  |  |  |  | <.001* |
| Female | 2361 (47.99) | 1079 (48.93) | 979 (53.91) | 89 (24.66) | 214 (40.70) |  |
| Male | 2517 (52.01) | 1043 (51.07) | 850 (46.09) | 288 (75.34) | 336 (59.30) |  |
| Race and ethnicity, n (%) |  |  |  |  |  | <.001* |
| Mexican American | 582 (9.15) | 292 (11.32) | 198 (7.70) | 38 (7.49) | 54 (7.73) |  |
| Other Hispanic | 422 (6.23) | 203 (7.01) | 144 (5.27) | 32 (7.19) | 43 (6.10) |  |
| Non-Hispanic White | 1990 (65.30) | 828 (61.18) | 781 (69.21) | 148 (64.66) | 233 (66.72) |  |
| Non-Hispanic Black | 1058 (11.08) | 505 (12.93) | 331 (8.90) | 79 (10.09) | 143 (12.69) |  |
| Other Race | 826 (8.25) | 294 (7.57) | 375 (8.92) | 80 (10.57) | 77 (6.76) |  |
| Education level, n (%) |  |  |  |  |  | <.001* |
| <9th grade | 197 (2.87) | 129 (4.39) | 45 (1.62) | 11 (2.24) | 12 (2.32) |  |
| 9–11th grade | 594 (9.94) | 371 (15.49) | 146 (6.43) | 39 (6.81) | 38 (4.93) |  |
| High school diploma/GED | 1045 (21.00) | 549 (26.57) | 333 (18.06) | 83 (21.29) | 80 (11.79) |  |
| Some College/AA degree | 1647 (33.90) | 714 (35.44) | 589 (30.73) | 113 (32.87) | 231 (39.83) |  |
| ≥ College graduate | 1395 (32.28) | 359 (18.11) | 716 (43.17) | 131 (36.79) | 189 (41.12) |  |
| Family income-to-poverty ratio, n (%) |  |  |  |  |  | <.001* |
| <1.3 | 1653 (24.46) | 905 (32.16) | 482 (18.53) | 105 (19.63) | 161 (21.30) |  |
| 1.3-<3.5 | 1611 (33.31) | 708 (36.02) | 600 (32.20) | 129 (32.69) | 174 (28.30) |  |
| ≥ 3.5 | 1614 (42.22) | 509 (31.82) | 747 (49.27) | 143 (47.68) | 215 (50.40) |  |
| BMI, mean (SD), kg/m2 | 28.66 (6.59) | 29.69 (7.14) | 28.31 (6.29) | 27.20 (5.54) | 27.30 (5.64) | <.001* |
| BMI group, n (%) |  |  |  |  |  | <.001* |
| <18.5 | 84 (1.43) | 45 (1.91) | 27 (1.18) | 5 (0.53) | 7 (1.21) |  |
| 18.5-<25 | 1505 (30.04) | 557 (24.75) | 597 (30.63) | 154 (39.13) | 197 (39.86) |  |
| 25-<30 | 1556 (33.62) | 654 (31.64) | 590 (35.54) | 125 (32.97) | 187 (34.41) |  |
| ≥ 30 | 1733 (34.91) | 866 (41.71) | 615 (32.64) | 93 (27.37) | 159 (24.52) |  |
| Smoking status, n (%) |  |  |  |  |  | <.001* |
| Never | 2889 (58.12) | 1129 (51.99) | 1175 (62.11) | 213 (54.98) | 372 (67.69) |  |
| Former | 813 (18.69) | 337 (17.01) | 327 (20.03) | 67 (22.93) | 82 (17.15) |  |
| Current | 1176 (23.19) | 656 (31.01) | 327 (17.87) | 97 (22.09) | 96 (15.16) |  |
| Drinking status, n (%) |  |  |  |  |  | 0.011* |
| No | 1092 (17.05) | 526 (18.91) | 434 (17.81) | 53 (12.54) | 79 (11.28) |  |
| Yes | 3786 (82.95) | 1596 (81.09) | 1395 (82.19) | 324 (87.46) | 471 (88.72) |  |
| Diatabes, n (%) |  |  |  |  |  | <.001* |
| No | 4383 (91.75) | 1848 (88.95) | 1649 (92.31) | 359 (95.46) | 527 (96.89) |  |
| Yes | 495 (8.25) | 274 (11.05) | 180 (7.69) | 18 (4.54) | 23 (3.11) |  |
| Hypertension, n (%) |  |  |  |  |  | <.001* |
| No | 3634 (75.33) | 1483 (70.43) | 1395 (76.63) | 309 (82.80) | 447 (82.59) |  |
| Yes | 1244 (24.67) | 639 (29.57) | 434 (23.37) | 68 (17.20) | 103 (17.41) |  |
| Cardiovascular disease, n (%) |  |  |  |  |  | <.001* |
| No | 4704 (96.96) | 2000 (94.94) | 1790 (98.02) | 369 (98.06) | 545 (99.50) |  |
| Yes | 174 (3.04) | 122 (5.06) | 39 (1.98) | 8 (1.94) | 5 (0.50) |  |
| Sedentary time, mean (SD), h/d | 6.76 (3.42) | 6.73 (3.50) | 6.91 (3.41) | 6.67 (3.39) | 6.38 (3.11) | 0.276 |
| Sedentary time group, n (%) |  |  |  |  |  | 0.346 |
| ≤ 4 | 1588 (30.55) | 705 (31.13) | 570 (29.09) | 129 (31.19) | 184 (33.00) |  |
| ＞4 -6 | 998 (20.64) | 421 (20.12) | 363 (20.24) | 82 (21.56) | 132 (23.04) |  |
| ＞6 -8 | 1026 (20.33) | 481 (22.16) | 371 (19.85) | 73 (18.17) | 101 (17.17) |  |
| ＞8 | 1266 (28.48) | 515 (26.59) | 525 (30.82) | 93 (29.08) | 133 (26.79) |  |
| Total MVPA, mean (SD), min/wk | 78.51 (112.89) | 0.00 (0.00) | 66.65 (36.29) | 274.44 (129.22) | 252.39 (117.93) | <.001* |
| ASMI, mean (SD), kg/m2 | 7.93 (1.67) | 7.95 (1.73) | 7.74 (1.62) | 8.30 (1.61) | 8.23 (1.62) | 0.006* |
| Combined grip strength, mean (SD), kg | 77.58 (22.05) | 76.01 (21.84) | 75.62 (21.78) | 86.94 (21.61) | 83.11 (21.52) | <.001* |
| a Sample size was weighted to be nationally representative.  Abbreviations: BMI, body mass index; MVPA, moderate to vigorous physical activity; ASMI, appendicular skeletal muscle mass index.  Significance levels were set by *p*<.05* | | | | | | |

| **Supplementary Table S2. Association of PA with ASMI and GS stratified by sedentary time** | | | | | | |
| --- | --- | --- | --- | --- | --- | --- |
|  | β (95% CI) | | | | | |
|  | ASMI | | | GS | | |
|  | Model 1a | Model 2b | Model 3c | Model 1a | Model 2b | Model 3c |
| Sedentary time (h/day): ≤4 |  |  |  |  |  |  |
| PA patterns |  |  |  |  |  |  |
| Inactive | 0.00 (Reference) | 0.00 (Reference) | 0.00 (Reference) | 0.00 (Reference) | 0.00 (Reference) | 0.00 (Reference) |
| Insufficiently active | **-0.40 (-0.57 ~ -0.24)*** | -0.05 (-0.15 ~ 0.06) | -0.06 (-0.16 ~ 0.04) | -2.26 (-4.78 ~ 0.25) | 0.76 (-1.17 ~ 2.69) | 0.80 (-1.15 ~ 2.75) |
| Physically active | **0.27 (0.02 ~ 0.52)*** | **0.24 (0.13 ~ 0.35)*** | **0.23 (0.12 ~ 0.34)*** | **5.97 (2.04 ~ 9.90)*** | 0.54 (-2.56 ~ 3.64) | 0.57 (-2.55 ~ 3.69) |
| *P* for trend | **0.035*** | **<.001*** | **<.001*** | **0.004*** | 0.721 | 0.705 |
| Per 1 h/wk increase | **0.09 (0.04 ~ 0.14)*** | **0.06 (0.04 ~ 0.08)*** | **0.06 (0.03 ~ 0.08)*** | **1.57 (0.85 ~ 2.29)*** | 0.11 (-0.44 ~ 0.66) | 0.11 (-0.46 ~ 0.68) |
| Sedentary time (h/day): ＞4 -6 |  |  |  |  |  |  |
| PA patterns |  |  |  |  |  |  |
| Inactive | 0.00 (Reference) | 0.00 (Reference) | 0.00 (Reference) | 0.00 (Reference) | 0.00 (Reference) | 0.00 (Reference) |
| Insufficiently active | -0.25 (-0.56 ~ 0.07) | **0.17 (0.01 ~ 0.32)*** | 0.15 (-0.01 ~ 0.32) | -0.96 (-6.26 ~ 4.33) | 2.85 (-0.54 ~ 6.25) | 3.00 (-0.41 ~ 6.40) |
| Physically active | 0.29 (-0.16 ~ 0.75) | **0.43 (0.23 ~ 0.63)*** | **0.40 (0.19 ~ 0.61)*** | **6.46 (1.31 ~ 11.62)*** | **4.14 (1.40 ~ 6.88)*** | **4.28 (1.34 ~ 7.23)*** |
| *P* for trend | 0.198 | **<.001*** | **<.001*** | **0.002*** | **0.005*** | **0.007*** |
| Per 1 h/wk increase | **0.09 (0.02 ~ 0.17)*** | **0.09 (0.05 ~ 0.12)*** | **0.08 (0.04 ~ 0.12)*** | **1.82 (1.01 ~ 2.64)*** | **0.78 (0.28 ~ 1.29)*** | **0.83 (0.27 ~ 1.38)*** |
| Sedentary time (h/day): ＞6 -8 |  |  |  |  |  |  |
| PA patterns |  |  |  |  |  |  |
| Inactive | 0.00 (Reference) | 0.00 (Reference) | 0.00 (Reference) | 0.00 (Reference) | 0.00 (Reference) | 0.00 (Reference) |
| Insufficiently active | -0.20 (-0.49 ~ 0.09) | 0.04 (-0.12 ~ 0.19) | 0.03 (-0.12 ~ 0.17) | -0.80 (-4.46 ~ 2.86) | 0.18 (-2.53 ~ 2.90) | -0.37 (-2.97 ~ 2.23) |
| Physically active | **0.43 (0.07 ~ 0.79)*** | **0.25 (0.10 ~ 0.40)*** | **0.24 (0.09 ~ 0.38)*** | **11.45 (5.07 ~ 17.83)*** | 2.83 (-0.79 ~ 6.44) | 2.12 (-1.49 ~ 5.73) |
| *P* for trend | **0.022*** | **0.002*** | **0.003*** | **<.001*** | 0.120 | 0.233 |
| Per 1 h/wk increase | 0.06 (-0.02 ~ 0.14) | 0.02 (-0.01 ~ 0.06) | 0.02 (-0.01 ~ 0.06) | **1.82 (0.38 ~ 3.25)*** | 0.34 (-0.35 ~ 1.02) | 0.21 (-0.47 ~ 0.89) |
| Sedentary time (h/day): ＞8 |  |  |  |  |  |  |
| PA patterns |  |  |  |  |  |  |
| Inactive | 0.00 (Reference) | 0.00 (Reference) | 0.00 (Reference) | 0.00 (Reference) | 0.00 (Reference) | 0.00 (Reference) |
| Insufficiently active | 0.02 (-0.27 ~ 0.31) | **0.19 (0.09 ~ 0.29)*** | **0.18 (0.08 ~ 0.28)*** | 2.71 (-1.05 ~ 6.48) | 1.38 (-1.49 ~ 4.26) | 1.33 (-1.60 ~ 4.26) |
| Physically active | **0.29 (0.04 ~ 0.54)*** | **0.42 (0.27 ~ 0.56)*** | **0.41 (0.25 ~ 0.57)*** | **11.65 (8.47 ~ 14.83)*** | **5.11 (2.29 ~ 7.93)*** | **4.96 (2.15 ~ 7.77)*** |
| *P* for trend | **<.001*** | **<.001*** | **<.001** | **<.001*** | **0.001*** | **0.002*** |
| Per 1 h/wk increase | **0.11 (0.06 ~ 0.17)*** | **0.08 (0.05 ~ 0.12)*** | **0.08 (0.05 ~ 0.12)*** | **2.85 (2.27 ~ 3.43)*** | **1.02 (0.59 ~ 1.44)*** | **0.99 (0.56 ~ 1.42)*** |
| a Crude | | | | | | |
| b Adjusted for age, sex, race and ethnicity, education, poverty-income ratio, weight or BMI. | | | | | | |
| c Model 2 + smoking status, drinking status, diabetes, hypertension, and CVD. | | | | | | |
| Abbreviations: ASMI, appendicular skeletal muscle mass index; GS, grip strength; PA, physical activity; CI, confidence interval; CVD, cardiovascular disease. | | | | | | |
| Significance levels were set by *p*<.05* | | | | | | |

| **Supplementary Table S3. Joint association of sedentary time and PA with ASMI and GS** | | | | | | | |
| --- | --- | --- | --- | --- | --- | --- | --- |
| Sedentary time, h/day | PA patterns | β (95% CI) | | | | | |
| ASMI | | | GS | | |
| Model 1a | Model 2b | Model 3c | Model 1a | Model 2b | Model 3c |
| ＞8 | Inactive | 0.00 (Reference) | 0.00 (Reference) | 0.00 (Reference) | 0.00 (Reference) | 0.00 (Reference) | 0.00 (Reference) |
| Insufficiently active | 0.02 (-0.27 ~ 0.32) | **0.18 (0.08 ~ 0.28)*** | **0.17 (0.07 ~ 0.28)*** | 2.71 (-1.12 ~ 6.55) | 0.82 (-1.71 ~ 3.35) | 0.87 (-1.77 ~ 3.50) |
| Physically active | **0.29 (0.04 ~ 0.55)*** | **0.40 (0.24 ~ 0.56)*** | **0.39 (0.22 ~ 0.56)*** | **11.65 (8.42 ~ 14.89)*** | **4.33 (2.14 ~ 6.53)*** | **4.22 (2.01 ~ 6.44)*** |
| ＞6 -8 | Inactive | 0.08 (-0.22 ~ 0.37) | **0.13 (0.01 ~ 0.24)*** | **0.13 (0.01 ~ 0.25)*** | 3.04 (-1.00 ~ 7.09) | 1.96 (-0.33 ~ 4.25) | 2.29 (-0.04 ~ 4.62) |
| Insufficiently active | -0.12 (-0.43 ~ 0.19) | **0.19 (0.02 ~ 0.32)*** | **0.17 (0.03 ~ 0.31)*** | 2.24 (-1.43 ~ 5.92) | 1.74 (-0.15 ~ 3.64) | 1.79 (-0.20 ~ 3.77) |
| Physically active | **0.50 (0.15 ~ 0.85)*** | **0.43 (0.29 ~ 0.57)*** | **0.42 (0.27 ~ 0.56)*** | **14.49 (8.66 ~ 20.33)*** | **4.11 (1.13 ~ 7.08)*** | **3.98 (0.77 ~ 7.19)*** |
| ＞4 -6 | Inactive | 0.03 (-0.25 ~ 0.31) | 0.12 (-0.02 ~ 0.25) | 0.12 (-0.02 ~ 0.26) | 2.88 (-1.46 ~ 7.21) | 0.60 (-1.61 ~ 2.80) | 0.54 (-1.73 ~ 2.80) |
| Insufficiently active | -0.22 (-0.53 ~ 0.09) | **0.27 (0.14 ~ 0.41)*** | **0.27 (0.13 ~ 0.40)*** | 1.91 (-2.77 ~ 6.59) | **3.30 (0.23 ~ 6.38)*** | **3.35 (0.22 ~ 6.48)*** |
| Physically active | 0.32 (-0.06 ~ 0.70) | **0.53 (0.35 ~ 0.70)*** | **0.50 (0.32 ~ 0.69)*** | **9.34 (4.80 ~ 13.88)*** | **4.42 (2.01 ~ 6.83)*** | **4.30 (1.86 ~ 6.74)*** |
| ≤ 4 | Inactive | **0.27 (0.04 ~ 0.50)*** | **0.33 (0.21 ~ 0.45)*** | **0.33 (0.20 ~ 0.46)*** | **6.96 (3.67 ~ 10.25)*** | **3.81 (1.27 ~ 6.35)*** | **3.79 (1.24 ~ 6.34)*** |
| Insufficiently active | -0.13 (-0.42 ~ 0.15) | **0.29 (0.17 ~ 0.41)*** | **0.27 (0.15 ~ 0.40)*** | **4.69 (1.78 ~ 7.61)*** | **5.06 (3.36 ~ 6.76)*** | **5.05 (3.35 ~ 6.76)*** |
| Physically active | **0.54 (0.25 ~ 0.83)*** | **0.58 (0.45 ~ 0.70)*** | **0.57 (0.45 ~ 0.70)*** | **12.93 (8.39 ~ 17.47)*** | **5.52 (3.01 ~ 8.02)*** | **5.50 (2.95 ~ 8.05)*** |
| a Crude  b Adjusted for age, sex, race and ethnicity, education, poverty-income ratio, weight or BMI.  c Model 2 + smoking status, drinking status, diabetes, hypertension, and CVD.  Abbreviations: ASMI, appendicular skeletal muscle mass index; GS, grip strength; PA, physical activity; CI, confidence interval; CVD, cardiovascular disease.  Significance levels were set by *p*<.05* | | | | | | | |

| **Supplementary Table S4. Joint association of sedentary time and PA with ASMI and GS stratified by sex** | | | | | |
| --- | --- | --- | --- | --- | --- |
| Sedentary time, h/day | PA patterns | β (95% CI)a | | | |
| ASMI | | GS | |
| Male | Female | Male | Female |
| ＞8 | Inactive | 0.00 (Reference) | 0.00 (Reference) | 0.00 (Reference) | 0.00 (Reference) |
| Insufficiently active | **0.22 (0.00 ~ 0.43)*** | **0.15 (0.04 ~ 0.26)*** | 2.21 (-2.24 ~ 6.65) | -0.25 (-2.35 ~ 1.84) |
| Physically active | **0.53 (0.29 ~ 0.76)*** | 0.18 (-0.01 ~ 0.38) | **5.75 (2.16 ~ 9.33)*** | **2.99 (0.09 ~ 5.89)*** |
| ＞6 -8 | Inactive | 0.19 (-0.01 ~ 0.39) | 0.09 (-0.08 ~ 0.25) | 3.68 (-0.40 ~ 7.76) | 0.80 (-1.30 ~ 2.90) |
| Insufficiently active | 0.25 (0.00 ~ 0.50) | 0.12 (-0.04 ~ 0.27) | 3.04 (-1.06 ~ 7.14) | 0.82 (-1.34 ~ 2.98) |
| Physically active | **0.50 (0.29 ~ 0.70)*** | **0.33 (0.13 ~ 0.53)*** | **6.71 (1.86 ~ 11.55)*** | -0.56 (-3.57 ~ 2.44) |
| ＞4 -6 | Inactive | 0.19 (-0.03 ~ 0.41) | 0.06 (-0.10 ~ 0.22) | 2.01 (-2.57 ~ 6.59) | -0.51 (-2.85 ~ 1.84) |
| Insufficiently active | **0.26 (0.04 ~ 0.47)*** | **0.30 (0.16 ~ 0.44)*** | 4.54 (-0.99 ~ 10.08) | 2.29 (-0.45 ~ 5.04) |
| Physically active | **0.58 (0.31 ~ 0.86)*** | **0.45 (0.24 ~ 0.65)*** | **6.28 (2.04 ~ 10.52)*** | 1.97 (-0.95 ~ 4.89) |
| ≤ 4 | Inactive | **0.38 (0.19 ~ 0.58)*** | **0.31 (0.15 ~ 0.46)*** | **4.97 (1.41 ~ 8.53)*** | 2.55 (-0.46 ~ 5.57) |
| Insufficiently active | **0.34 (0.16 ~ 0.52)*** | **0.24 (0.07 ~ 0.40)*** | **6.70 (3.45 ~ 9.94)*** | **3.43 (1.49 ~ 5.36)*** |
| Physically active | **0.67 (0.45 ~ 0.89)*** | **0.47 (0.26 ~ 0.67)*** | **7.08 (2.58 ~ 11.57)*** | **3.97 (0.79 ~ 7.14)*** |
| P for interaction | | 0.388 | | 0.801 | |
| a Adjusted for age, race and ethnicity, education, poverty-income ratio, weight or BMI, smoking status, drinking status, diabetes, hypertension, and CVD. | | | | | |
| Abbreviations: ASMI, appendicular skeletal muscle mass index; GS, grip strength; PA, physical activity; CI, confidence interval; CVD, cardiovascular disease. | | | | | |
|  |  |  |  |  |  |

Significance levels were set by *p*<.05*

| **Supplementary Table S5. Joint association of sedentary time and PA with ASMI and GS stratified by age** | | | | | |
| --- | --- | --- | --- | --- | --- |
| Sedentary time, h/day | PA patterns | β (95% CI)a | | | |
| ASMI | | GS | |
| ＜45 years old | ≥ 45 years old | ＜45 years old | ≥ 45 years old |
| ＞8 | Inactive | 0.00 (Reference) | 0.00 (Reference) | 0.00 (Reference) | 0.00 (Reference) |
| Insufficiently active | **0.19 (0.07 ~ 0.31)*** | 0.15 (-0.04 ~ 0.33) | -0.25 (-3.33 ~ 2.82) | 1.83 (-1.83 ~ 5.49) |
| Physically active | **0.36 (0.17 ~ 0.55)*** | **0.49 (0.22 ~ 0.75)*** | **3.33 (0.96 ~ 5.70)*** | **5.54 (0.66 ~ 10.42)*** |
| ＞6 -8 | Inactive | **0.18 (0.02 ~ 0.34)*** | 0.03 (-0.20 ~ 0.25) | 1.01 (-1.62 ~ 3.64) | 2.98 (-0.65 ~ 6.61) |
| Insufficiently active | **0.24 (0.07 ~ 0.41)*** | 0.04 (-0.20 ~ 0.29) | 0.82 (-1.43 ~ 3.08) | 2.43 (-2.10 ~ 6.95) |
| Physically active | **0.51 (0.32 ~ 0.70)*** | 0.15 (-0.17 ~ 0.46) | 2.04 (-1.37 ~ 5.46) | **9.62 (3.50 ~ 15.75)*** |
| ＞4 -6 | Inactive | **0.20 (0.03 ~ 0.37)*** | 0.01 (-0.25 ~ 0.26) | 0.34 (-2.72 ~ 3.40) | 1.04 (-3.01 ~ 5.09) |
| Insufficiently active | **0.32 (0.17 ~ 0.48)*** | 0.18 (-0.05 ~ 0.40) | 2.30 (-1.31 ~ 5.90) | 3.92 (-1.01 ~ 8.85) |
| Physically active | **0.50 (0.31 ~ 0.69)*** | **0.67 (0.18 ~ 1.16)*** | **3.43 (0.94 ~ 5.92)*** | **7.04 (1.37 ~ 12.72)*** |
| ≤ 4 | Inactive | **0.33 (0.17 ~ 0.49)*** | **0.29 (0.07 ~ 0.52)*** | **3.84 (1.04 ~ 6.63)*** | 2.52 (-0.81 ~ 5.85) |
| Insufficiently active | **0.27 (0.15 ~ 0.40)*** | **0.26 (0.01 ~ 0.51)*** | **4.45 (2.03 ~ 6.87)*** | **4.80 (1.81 ~ 7.79)*** |
| Physically active | **0.60 (0.43 ~ 0.77)*** | **0.53 (0.34 ~ 0.73)*** | **4.90 (1.68 ~ 8.13)*** | **5.74 (1.97 ~ 9.51)*** |
| P for interaction | | 0.278 | | 0.354 | |
| a Adjusted for sex, race and ethnicity, education, poverty-income ratio, weight or BMI, smoking status, drinking status, diabetes, hypertension, and CVD. | | | | | |
| Abbreviations: ASMI, appendicular skeletal muscle mass index; GS, grip strength; PA, physical activity; CI, confidence interval; CVD, cardiovascular disease.  Significance levels were set by *p*<.05* | | | | | |

| **Supplementary Table S6. Association of PA pattern with ASMI and GS stratified by sex** | | | | |
| --- | --- | --- | --- | --- |
| PA patterns | β (95% CI) | | | |
| ASMIa | | GSa | |
| Male | Female | Male | Female |
| Inactive | 0.00 (Reference) | 0.00 (Reference) | 0.00 (Reference) | 0.00 (Reference) |
| Insufficiently active | 0.07 (-0.05 ~ 0.18) | **0.08 (0.01 ~ 0.15)*** | 1.42 (-1.24 ~ 4.08) | 0.73 (-0.63 ~ 2.09) |
| WW | **0.27 (0.10 ~ 0.43)*** | 0.09 (-0.09 ~ 0.27) | 3.06 (-0.39 ~ 6.50) | -0.65 (-3.22 ~ 1.92) |
| RA | **0.45 (0.33 ~ 0.58)*** | **0.30 (0.16 ~ 0.43)*** | **4.03 (0.85 ~ 7.21)*** | **2.50 (0.53 ~ 4.47)*** |
| P for interaction | 0.120 | | 0.300 | |
| a Adjusted for age, race and ethnicity, education, poverty-income ratio, weight or BMI, smoking status, drinking status, diabetes, hypertension, CVD, and sedentary time. | | | | |
| Abbreviations: WW, weekend warrior; RA, regularly active; ASMI, appendicular skeletal muscle mass index; GS, grip strength; PA, physical activity; CI, confidence interval; CVD, cardiovascular disease.  Significance levels were set by *p*<.05* | | | | |

| **Supplementary Table S7. Association of PA pattern with ASMI and GS stratified by age** | | | | |
| --- | --- | --- | --- | --- |
| PA patterns | β (95% CI) | | | |
| ASMIa | | GSa | |
| ＜45 years old | ≥ 45 years old | ＜45 years old | ≥ 45 years old |
| Inactive | 0.00 (Reference) | 0.00 (Reference) | 0.00 (Reference) | 0.00 (Reference) |
| Insufficiently active | **0.07 (0.01 ~ 0.13)*** | 0.07 (-0.06 ~ 0.20) | 0.44 (-0.91 ~ 1.79) | 1.69 (-0.67 ~ 4.05) |
| WW | **0.17 (0.02 ~ 0.31)*** | **0.37 (0.15 ~ 0.60)*** | 1.25 (-1.58 ~ 4.07) | 3.27 (-0.30 ~ 6.84) |
| RA | **0.40 (0.29 ~ 0.50)*** | **0.41 (0.22 ~ 0.59)*** | **2.49 (0.61 ~ 4.38)*** | **5.83 (2.52 ~ 9.13)*** |
| P for interaction | 0.360 | | 0.056 | |
| a Adjusted for sex, race and ethnicity, education, poverty-income ratio, weight or BMI, smoking status, drinking status, diabetes, hypertension, CVD, and sedentary time. | | | | |
| Abbreviations: WW, weekend warrior; RA, regularly active; ASMI, appendicular skeletal muscle mass index; GS, grip strength; PA, physical activity; CI, confidence interval; CVD, cardiovascular disease.  Significance levels were set by *p*<.05* | | | | |

| **Supplementary Table S8. Association of RA with ASMI and GS, with inactive as reference** | | | |
| --- | --- | --- | --- |
|  | | β (95% CI) | |
| Dimension | ASMIa | | GSa |
| PA pattern |  | |  |
| Inactive | 0.00 (Reference) | | 0.00 (Reference) |
| RA | **0.38 (0.29 ~ 0.48)*** | | **3.04 (0.97 ~ 5.11**)* |
| Frequency, sessions/wk |  | |  |
| 3-4 | **0.29 (0.17 ~ 0.40)*** | | **2.35 (0.00 ~ 4.70)*** |
| ≥5 | **0.52 (0.37 ~ 0.68)*** | | **4.05 (1.38 ~ 6.73)*** |
| Duration of session, min |  | |  |
| ≤ 30 (Q1) | **0.39 (0.26 ~ 0.51)*** | | **2.93 (0.57 ~ 5.28)*** |
| ＞30 -45 (Q2) | **0.37 (0.20 ~ 0.54)*** | | **3.72 (0.72 ~ 6.72)*** |
| ＞45 (Q3) | **0.39 (0.23 ~ 0.55)*** | | 2.65 (-0.34 ~ 5.63) |
| Intensity (VPA/total PA), % |  | |  |
| 0 | 0.09 (-0.22 ~ 0.40) | | 4.25 (-1.91 ~ 10.41) |
| 1-50 | 0.24 (-0.16 ~ 0.64) | | 1.10 (-4.68 ~ 6.89) |
| 51-99 | **0.42 (0.32 ~ 0.52)*** | | **3.06 (0.60 ~ 5.53)*** |
| 100 | **0.45 (0.31 ~ 0.59)*** | | 3.02 (-0.39 ~ 6.44) |
| a Adjusted for age, sex, race and ethnicity, education, poverty-income ratio, weight or BMI, smoking status, drinking status, diabetes, hypertension, CVD, and sedentary time. | | | |
| Abbreviations: RA, regularly active; ASMI, appendicular skeletal muscle mass index; GS, grip strength; PA, physical activity; CI, confidence interval; CVD, cardiovascular disease.  Significance levels were set by *p*<.05* | | | |
|  | |  |  |

| **Supplementary Table S9. Sensitivity analysis excluding participants with ≥600 min/week of PA: association of PA pattern with ASMI and GS** | | |
| --- | --- | --- |
| PA patterns | β (95% CI) | |
| ASMIa | GSa |
| Inactive | 0.00 (Reference) | 0.00 (Reference) |
| Insufficiently active | **0.07 (0.01 ~ 0.13)*** | 1.08 (-0.20 ~ 2.36) |
| WW | **0.20 (0.06 ~ 0.34)*** | 1.76 (-0.81 ~ 4.33) |
| RA | **0.38 (0.30 ~ 0.47)*** | **3.43 (1.45 ~ 5.40)*** |
| aAdjusted for age sex, race and ethnicity, education, poverty-income ratio, weight or BMI, smoking status, drinking status, diabetes, hypertension, CVD, and sedentary time. | | |
| Abbreviations: WW, weekend warrior; RA, regularly active; ASMI, appendicular skeletal muscle mass index; GS, grip strength; PA, physical activity; CI, confidence interval; CVD, cardiovascular disease.  Significance levels were set by *p*<.05* | | |

| **Supplementary Table S10. Sensitivity analysis excluding participants with ≥750 min/week of PA: association of PA pattern with ASMI and GS** | | |
| --- | --- | --- |
| PA patterns | β (95% CI) | |
| ASMIa | GSa |
| Inactive | 0.00 (Reference) | 0.00 (Reference) |
| Insufficiently active | **0.07 (0.01 ~ 0.13)*** | 1.06 (-0.22 ~ 2.34) |
| WW | **0.21 (0.07 ~ 0.35)*** | 1.87 (-0.55 ~ 4.30) |
| RA | **0.39 (0.31 ~ 0.48)*** | **3.27 (1.31 ~ 5.22)*** |
| a Adjusted for age sex, race and ethnicity, education, poverty-income ratio, weight or BMI, smoking status, drinking status, diabetes, hypertension, CVD, and sedentary time. | | |
| Abbreviations: WW, weekend warrior; RA, regularly active; ASMI, appendicular skeletal muscle mass index; GS, grip strength; PA, physical activity; CI, confidence interval; CVD, cardiovascular disease.  Significance levels were set by *p*<.05* | | |

| **Supplementary Table S11. Sensitivity analysis excluding participants extreme BMI: association of PA pattern with ASMI and GS** | | |
| --- | --- | --- |
| PA patterns | β (95% CI) | |
| ASMIa | GSa |
| Inactive | 0.00 (Reference) | 0.00 (Reference) |
| Insufficiently active | **0.09 (0.03 ~ 0.16)*** | 0.96 (-0.51 ~ 2.43) |
| WW | **0.22 (0.09 ~ 0.36)*** | 1.82 (-0.61 ~ 4.25) |
| RA | **0.42 (0.33 ~ 0.50)*** | **3.04 (1.00 ~ 5.07)*** |
| a Adjusted for age sex, race and ethnicity, education, poverty-income ratio, weight or BMI, smoking status, drinking status, diabetes, hypertension, CVD, and sedentary time. | | |
| Abbreviations: WW, weekend warrior; RA, regularly active; ASMI, appendicular skeletal muscle mass index; GS, grip strength; PA, physical activity; CI, confidence interval; CVD, cardiovascular disease.  Significance levels were set by *p*<.05* | | |
